# Supplementary material for: The bHLH Repressor Deadpan Regulates the Self-renewal and Specification of Drosophila Larval Neural Stem Cells Independently of Notch
Source: PubMed Central journal article supplement (PMC3466283; doi:10.1371/journal.pone.0046724), 2012-10-08

Figure S8\_Zhu

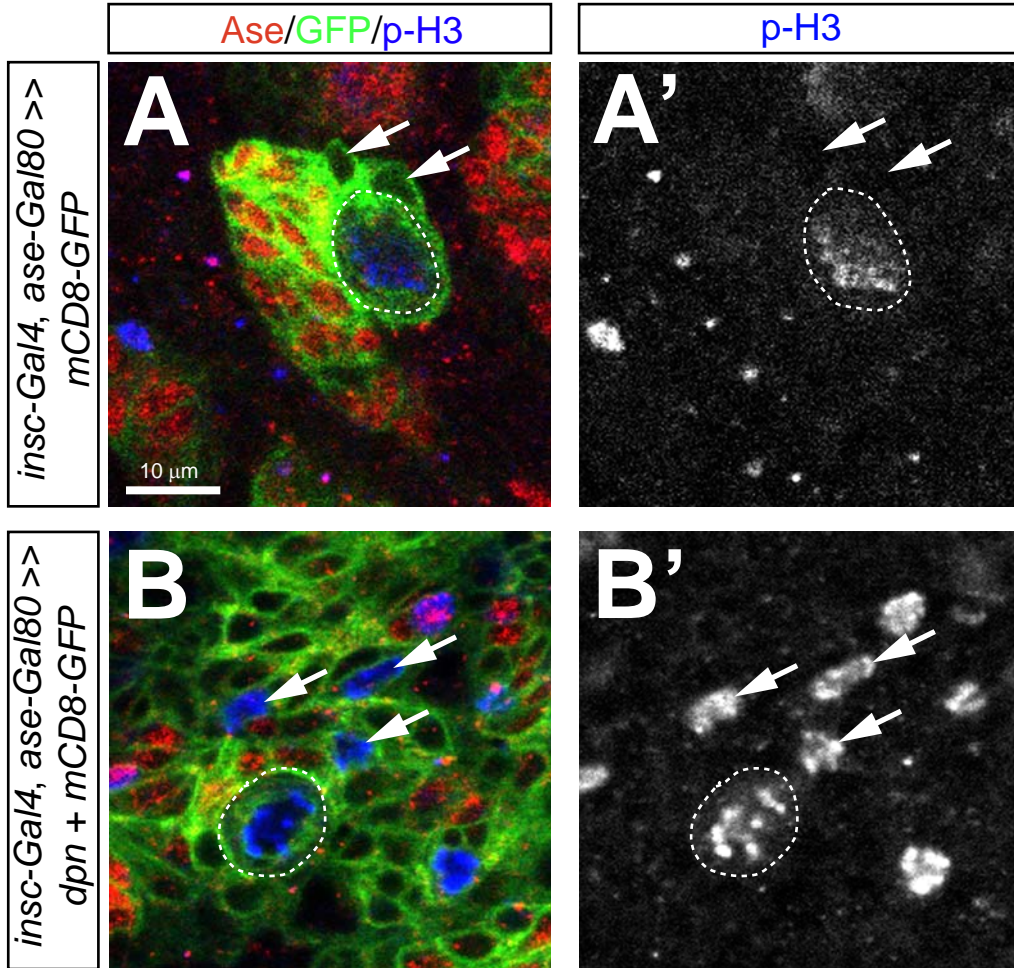

Supplement: pone.0046724.s008.pdf [file pone.0046724.s008.pdf]
